# Supplementary material for: Derivation of Brain Capillary-like Endothelial Cells from Human Pluripotent Stem Cell-Derived Endothelial Progenitor Cells
Source: PubMed Central journal article supplement — Stem Cell Reports. 2019 Sep 5;13(4):599–611. doi: 10.1016/j.stemcr.2019.08.002 (PMC6829749; doi:10.1016/j.stemcr.2019.08.002), 2019-09-05
Supplement: mmc1.pdf [file mmc1.pdf]

**Stem Cell Reports, Volume 13**

## **Supplemental Information**

### **Derivation of Brain Capillary-like Endothelial Cells from Human Pluripotent Stem Cell-Derived Endothelial Progenitor Cells**

**Catarina Praça, Susana C. Rosa, Emmanuel Sevin, Romeo Cecchelli, Marie-Pierre Dehouck, and Lino S. Ferreira**

## **SUPPLEMENTAL INFORMATION**

### **5 Supplemental data:**

- S1, related to Figure 2.
- S2, related to Figure 3.
- S3 and S4, related to Figure 4.
- Table S1, related to Figure 3.

### **Supplemental Experimental Procedures**

### **Supplemental References, related to Supplemental Experimental Procedures**

### **3 Supplemental Tables**

- Table S2, sequence of primers used in this study.
- Table S3, primary and secondary antibodies used in this study.
- Table S4, main products used in this study.

## Supplemental data items

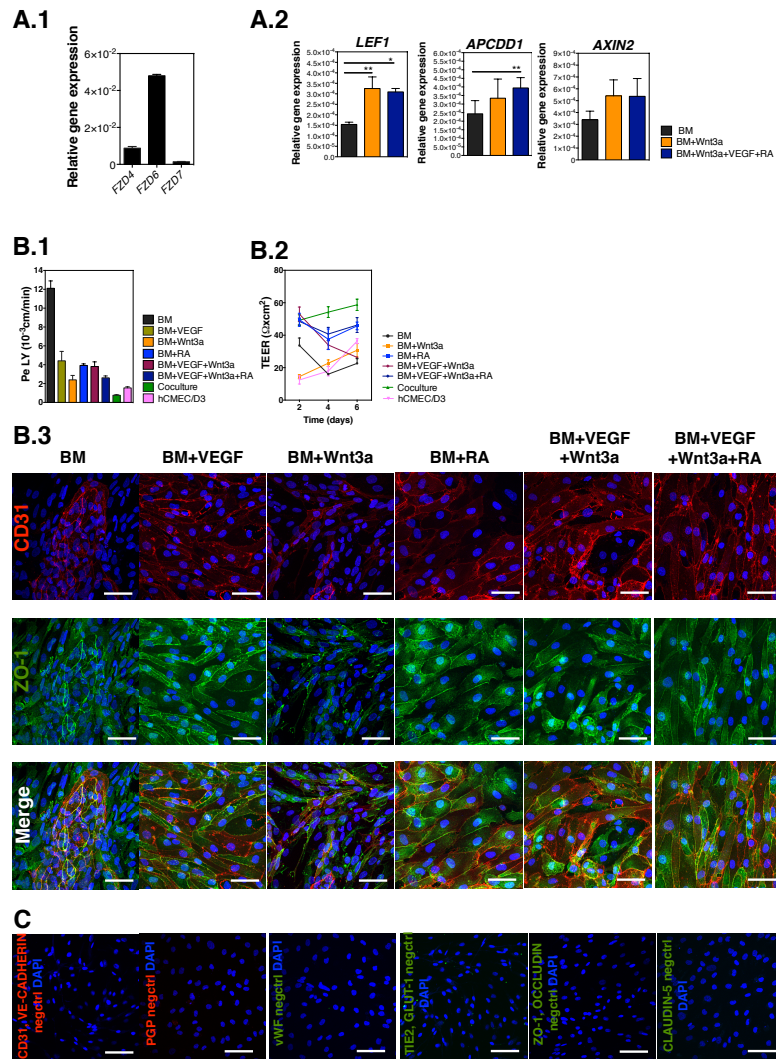

**Figure S1 – Gene expression of WNT pathway genes and functional characterization of non-purified endothelial cells after 6 days of culture in a transwell insert (related to Figure 2).**

**(A.1).** Relative gene expression of frizzled receptors (*FZD4*, *FZD6* and *FZD7*) in CD31-ECs at passage 1. Genes were normalized against the control gene *ACTB*. Mean  $\pm$  SEM (n=1 independent experiment, 3 technical replicates per experimental condition).

**(A.2)** Relative expression of *LEF1*, *AXIN2* and *APCDD1* genes in CD31<sup>+</sup> cells at passage 1 exposed to basal medium (BM) or to Wnt3a (BM+Wnt3a or BM+VEGF+Wnt3a+RA; 10 ng/mL of Wnt3a) for 24 h. Genes were normalized against the control gene *ACTB*. Mean  $\pm$  SEM (n=3 independent experiments, 3 technical replicates per experimental condition). \* $P < 0.05$  and \*\* $P < 0.01$  using one-way ANOVA followed by Dunnett's multiple comparison test.

**(B.1)** Paracellular permeability of cells to LY after 6 days of culture on Matrigel-coated filters. As controls we have used the hCMEC/D3 cell line and human hematopoietic progenitor cells derived ECs cocultured with pericytes (Coculture condition). Values are Mean  $\pm$  SEM (n=2 independent experiments, at least 3 transwell inserts per independent experiment and experimental condition).

**(B.2)** TEER at different time points for all the conditions tested on Matrigel-coated filters. As controls we have used the hCMEC/D3 cell line and human hematopoietic progenitor cells derived ECs cocultured with pericytes (Coculture condition). Values are Mean  $\pm$  SEM (n=2 independent experiments, at least 3 transwell inserts per independent experiment and experimental condition).

**(B.3)** Co-localization of CD31 and ZO-1 markers in the cells after 6 days of culture on Matrigel-coated filters. Scale bar is 50  $\mu$ m.

**(C)** Controls (without primary antibodies) for immunostaining analyses. Scale bar is 50  $\mu$ m.

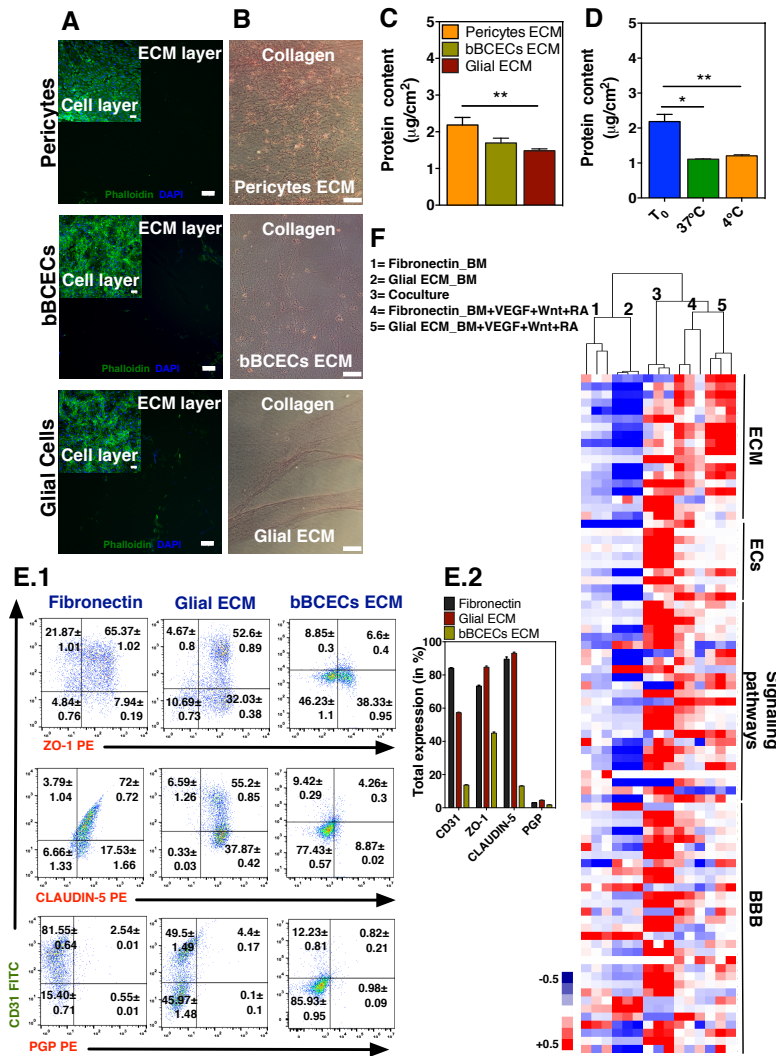

**Figure S2 – Isolation and characterization of decellularized ECM from cells of the neurovascular unit and characterization of BCLECs matured in these matrices in the presence of soluble factors (related to Figure 3).**

(A) Evaluation of the decellularization protocol efficacy by staining with DAPI and phalloidin. Scale bar is 50 µm.

(B) Evaluation of collagen by Sirius red assay. Scale bar is 100 µm.

(C) Comparison of ECM production from bovine pericytes, bovine brain capillary endothelial cells (bBCECs) and rat glial cells at day 8. Values are Mean  $\pm$  SEM (n= 3 independent experiment, 3 individual wells per experimental condition). \*\* $P<0.01$  using one-way ANOVA followed by Tukey's multiple comparison test.

(D) Stability of the native pericytes ECM at 37°C and 4°C in terms of maintenance of the collagen content. Values are Mean  $\pm$  SEM (n= 3 independent experiment, 3 individual wells per experimental condition). \* $P<0.05$  and \*\* $P<0.01$  using One-way Anova followed by Tukey's multiple comparison test.

(E.1) Expression by flow cytometry of BBB markers (ZO-1, CLAUDIN-5 and PGP) co-localized with CD31 marker in cells matured on fibronectin or decellularized matrices at passage 4. Percentages of positive cells were calculated based in the isotype controls (1%).

(E.2) Total expression of each cell marker in the different assessed conditions. Values are Mean  $\pm$  SEM (n=1 independent experiment, 3 individual wells per experimental condition).

(F) Heatmap and hierarchical clustering dendrogram in gene expression results obtained by Fluidigm. Relative gene expression levels on cells cultured on BM or BM+VEGF+Wnt3a+RA either on fibronectin or glial ECM (positive control was "coculture" condition, i.e., human hematopoietic stem/progenitor-derived ECs cocultured with pericytes, please see ref (Cecchelli et al., 2014) followed by their plating on Matrigel-coated transwell inserts for 6 days. Genes were normalized against the control gene *ACTB* (n=1 independent experiment, 3 technical replicates per experimental condition). For each gene, the normalized values were between +0.5 and -0.5 (please see Supplementary Information for further information). Gene expression that was above the gene expression median for all the experimental groups was shown in red, the expression below the median in blue and the expression similar to the median in white.

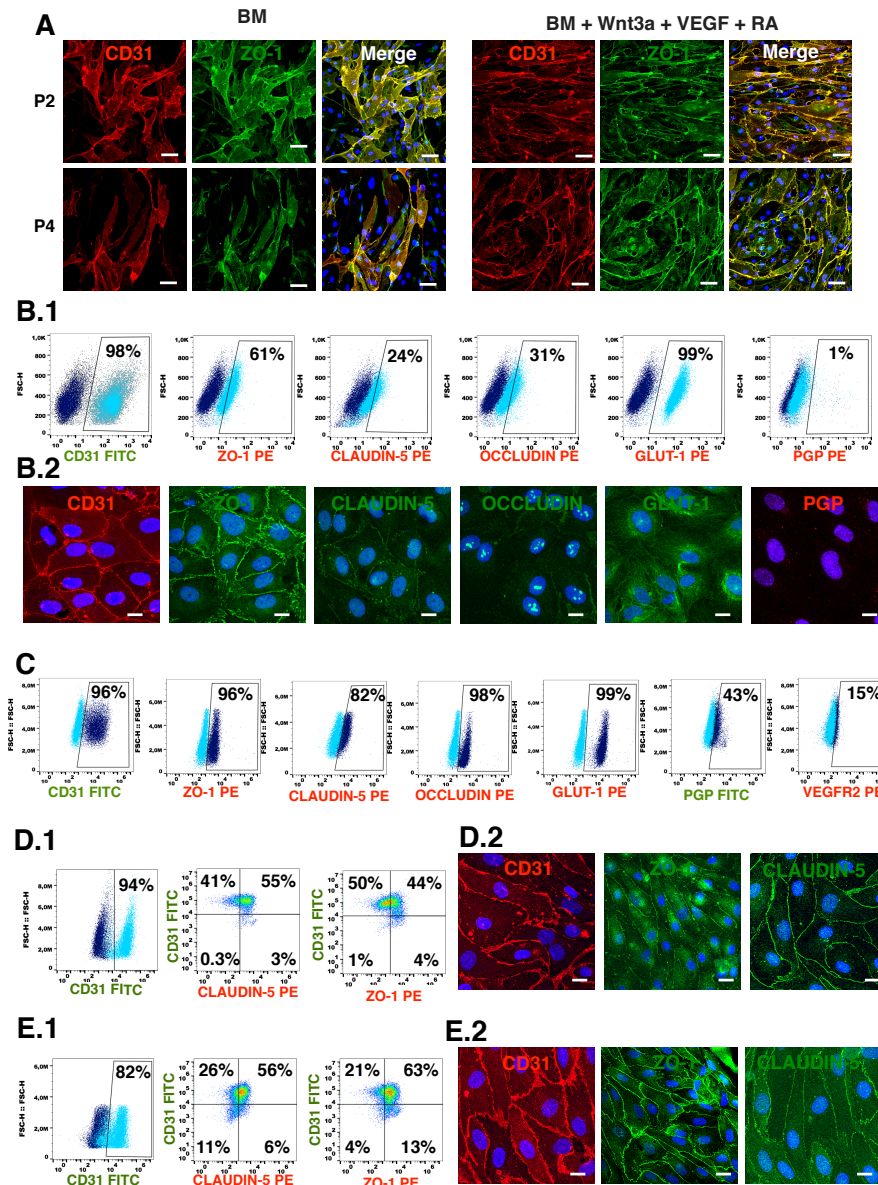

**Figure S3 – Characterization of BCLECs and control cells** (related to Figure 4).

(A) Immunofluorescence analyses for the co-localization of CD31 with ZO-1 proteins in BCLECs at passage 2 and 4 on fibronectin-coated plates. Scale bar is 50  $\mu$ m.

(B.1) Expression of BCEC markers in HUVECs by flow cytometry. Percentage of positive cells were calculated based in the isotype controls (1%; dark blue scatter plot).

(B.2) Immunofluorescence analyses of BCEC markers in HUVECs. Scale bar is 50  $\mu$ m.

(C) Expression of BCEC markers in hCMEC/D3 by flow cytometry. Percentage of positive cells were calculated based in the isotype controls (1%; light blue scatter plot).

(D.1) Characterization of BCLECs derived from a human embryonic stem cell line (hESCs-NKX2-<sup>5eGFP/W</sup>) by flow cytometry. Cells were cultured in BM+VEGF+Wnt3a+RA media for 4 passages. Percentages of positive cells were calculated based in the isotype controls (1%).

(D.2) Characterization of BCLECs derived from a human embryonic stem cell line (hESCs-NKX2-<sup>5eGFP/W</sup>) by immunofluorescence. Immunofluorescence analyses for CD31, ZO-1 and CLAUDIN-5 on cells plated on Matrigel-coated filters. Scale bar is 50  $\mu$ m.

(E.1) Characterization of BCLECs derived from iPSCs cell line (HGPS-iPSCs) by flow cytometry. Cells were cultured in BM+VEGF+Wnt3a+RA media for 4 passages. Percentages of positive cells were calculated based in the isotype controls (1%).

(E.2) Characterization of BCLECs derived from a iPSCs cell line (HGPS-iPSCs) by immunofluorescence. Immunofluorescence analyses for CD31, ZO-1 and CLAUDIN-5 on cells plated on Matrigel-coated filters. Scale bar is 50  $\mu$ m.

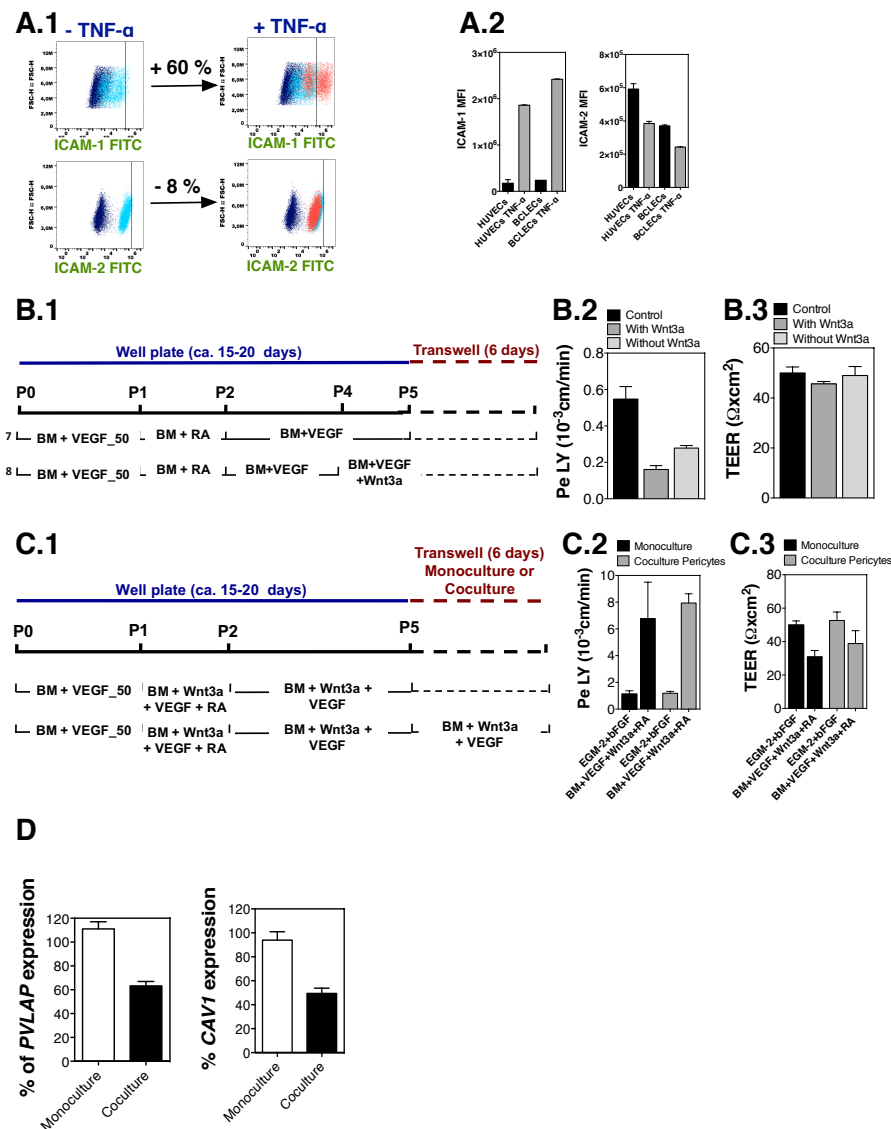

**Figure S4 – Functional Characterization of BCLEC** (related to Figure 4).

(A.1) Expression of adhesion molecules (ICAM-1 and ICAM-2) in HUVECs at basal level and after exposure to TNF- $\alpha$  (10 ng/mL) for 24 h, by flow cytometry. Percentage of positive cells were calculated based in the shift of the basal expression for each marker (1%; light blue scatter plot).

(A.2) Expression of ICAM-1 and ICAM-2 by mean intensity fluorescence (MFI; flow cytometry) in HUVECs and BCLECs at basal level and after exposure to TNF- $\alpha$  (10 ng/mL) for 24 h. Results are Mean  $\pm$  SEM (n=1 independent experiment, 3 technical replicates per experimental condition).

(B.1) Protocol used to assess the impact of Wnt3a at later stages of the specification.

(B.2) Paracellular permeability to LY at day 6 in the transwell system. Results are Mean  $\pm$  SEM (n=1 independent experiment, with 3 transwell inserts per experimental condition). Control are BCLECs derived with protocol 6.

(B.3) TEER at day 6 in the transwell system. Results are Mean  $\pm$  SEM (n=1 independent experiment, with 3 transwell inserts per experimental condition). Control are BCLECs derived with protocol 6.

(C.1) Protocol used to assess the impact of pericytes coculture.

(C.2) Paracellular permeability to LY at day 6 in the transwell system. Results are Mean  $\pm$  SEM (n=1 independent experiment, with 3 transwell inserts per experimental condition).

(C.3) TEER at day 6 in the transwell system. Results are Mean  $\pm$  SEM (n=1 independent experiment, 3 filters per condition).

(D) Relative gene expression of *PVLAP* and *CAVI* in BCLECs (cells differentiated with BM+VEGF+Wnt3a+RA) in filters in monoculture or coculture with pericytes at day 6. Data was normalized by day 3 in filters for each condition. Genes were normalized against the control gene *ACTB*. Results are Mean  $\pm$  SEM (n=1 independent experiment, 3 technical replicates per experimental condition).

**Table S1 – Relative gene expression data for heatmap** (in Excel format). The gene expression was normalized against the endogenous control (*ACTB*) and presented as relative gene expression. Related with Figure 3.

## SUPPLEMENTAL EXPERIMENTAL PROCEDURES

### Cultivation of pluripotent stem cells and differentiation into EPCs.

Pluripotent stem cells were kindly donated from several collaborators. K2-iPSC cell line generated from human cord blood (passages: 30-40) (Haase et al., 2009) and Hutchinson-Gilford Progeria Syndrome (HGPS) cell line generated from fibroblasts (passages: 43-51) (Nissan et al., 2012). For certain experiments the human embryonic stem cell line hESCs-NKX2-5<sup>eGFP/w</sup> (passages: 40-45) (Elliott et al., 2011) was used. Pluripotent stem cells were grown on mitomycin C-inactivated mouse embryonic fibroblast feeder layer in undifferentiating culture medium [(knockout Dulbecco's Modified Eagle Medium; DMEM (GIBCO)], 20% knockout serum replacer (Gibco), non-essential amino acids (1%, GIBCO),  $\beta$ -mercaptoethanol (0.1 mM, Sigma), L-glutamine (1 mM, Sigma), Pen/Strep (50 U/mL:50  $\mu$ g/mL, Lonza) and fibroblast growth factor-basic (bFGF; 5 ng/mL, Peprotech). iPSCs (at passages 27-35) were passaged every 3-4 days with collagenase IV (1mg/mL, Gibco) at a typical split ratio of 1:4 or 1:6. To initiate the differentiation, iPSCs ( $27 \times 10^3$  –  $45 \times 10^3$  cells per  $\text{cm}^2$ ) were treated for 45-60 min with collagenase IV and plated on fibronectin-coated dishes (1  $\mu$ g/ $\text{cm}^2$ ; Calbiochem) in a chemically defined medium (CDM) (Vallier et al., 2009) containing Iscove's Modified Dulbecco's Medium (IMDM; 50% (v/v), Gibco), F12 (50%, Gibco), BSA (5 mg/mL, Sigma),  $\beta$ -mercaptoethanol (0.1 mM, Sigma), Pen/Strep (50 U/mL:50  $\mu$ g/mL, Lonza), transferrin (15 mg/mL, Sigma) and insulin (7 mg/mL, Sigma). Immediately after cell seeding, to induce mesoderm differentiation, cells were exposed to bone morphogenetic protein 4 (BMP4, 10 ng/mL, Peprotech) for 1.5 days and then BMP4 (50 ng/mL, Peprotech) with bFGF (20 ng/mL, Peprotech) for 3.5 days. To differentiate mesoderm progenitor cells into endothelial cells, cells were cultured with vascular endothelial growth factor (VEGF<sub>165</sub>; 50 ng/mL, Peprotech) and thymosin  $\beta$ 4 (T $\beta$  4; 100 ng/mL, Caslo peptide synthesis). CD31<sup>+</sup> cells were isolated by Magnetic-Activated Cell Sorting (MACS; Miltenyi Biotec) (Rosa et al., 2019). CD31<sup>+</sup> enrichment was confirmed by flow cytometry analyses using a different anti-CD31 antibody (eBiosciences), with a positivity superior to 90%.

### Preparation of decellularized ECM.

We have prepared decellularized ECM from three different primary cells types: bovine pericytes, bovine brain capillary endothelial cells (bBCECs) and rat glial cells. Cells were plated on fibronectin-coated dishes (25  $\mu$ g/mL; 1.7  $\mu$ g/ $\text{cm}^2$  of fibronectin adsorbed to the culture dish as quantified by immunocytochemistry) at a cell density of  $3 \times 10^4$  cells per  $\text{cm}^2$  during 8-12 days to allow extracellular matrix deposition. Cell layers were then decellularized using a solution of 20 mM ammonium hydroxide (Sigma) in PBS supplemented with 0.5% Triton X-100 (Fluka). After 1 min with agitation in contact with the solution, the resulting ECM layers were washed 2x with PBS and 1x with EGM-2. ECM layers were either used immediately or stored at 4°C. Approximately 10% (i.e. 0.17  $\mu$ g/ $\text{cm}^2$  of fibronectin) of the initial bovine fibronectin was still adsorbed to the cell culture dish after the decellularization (data not shown).

### Endothelial permeability measurements.

To perform the assay,  $10 \times 10^4$  cells were seeded on a 12-well 0.4  $\mu$ m filters (Costar) coated with Matrigel and kept in culture with EGM-2 supplemented with bFGF (1 ng/mL) for 6 days. Before initiating the permeability experiment, EBM-2 was added to empty wells of a 12-well plate. Filter inserts containing the BCLECs were placed in the multi-well and filled with EBM-2 containing the fluorescent integrity marker Lucifer yellow (LY; 20  $\mu$ M, Sigma). The plates were placed on an orbital shaker for 1 h and then withdraw from the receiver compartment. The fluorescence of the samples (inserts with cells and without cells) was quantified using the wavelengths 430/530 (excitation/emission). The permeability values were generated through the blue-norna brain exposure simulator (<http://www.blue-norna.com>).

### TEER analyses.

BCLECs TEER ( $\text{Ohm} \times \text{cm}^2$ ) on Transwell filters was measured using the Millicell-ERS 2 (Electrical Resistance System, Millipore). The resistance of Matrigel-coated inserts was subtracted from the resistance obtained in the presence of the endothelial cultures according to the followed equation:  $\text{TEER} = [(\text{TEER, cells}) - (\text{TEER, insert}) \times A]$ , where A is the area of the filter ( $\text{cm}^2$ ).

### Dil-acLDL uptake

Cells were plated at a density of  $10 \times 10^4$  cells and 24 h later Dil-acLDL (Harbor Bio-Products, 20  $\mu$ g/mL) was added to the cells for 4 h at 37°C. At the end, Hoechst dye (0.25  $\mu$ g/mL) was added to stain cell nuclei. Cells were washed and kept in EGM-2. Images of the cells were acquired by a InCell Analyser HCA System.

### Immunocytochemistry analyses.

Cells were fixed in cold methanol/acetone (50%/50%, v/v) for 5 min or with 4% (v/v) paraformaldehyde (PFA; electron Microscopy Science) for 10 min at room temperature and permeabilized with Triton X-100 (0.1%, v/v, Fluka) for 10 min, whenever required. The cells were then blocked with BSA (1%, w/v, Sigma) solution for at least 30 min followed by incubation with primary antibody (Table S3) during 1 h at RT. After washing, the cells were stained with secondary antibody (Table S3) for 30 min in dark at room temperature. The nuclei of the cells were counterstained with DAPI

(Sigma) and cells mounted with cell-mounting medium (DAKO). All the photos were taken using confocal microscopy (Zeiss) with an 40x oil objective.

### **Flow cytometry analyses.**

Cells were dissociated from the culture plate by exposure to Cell Dissociation Buffer (Life Technologies) for 10 min and gentle pipetting, centrifuged and resuspended in PBS supplemented with 5% (v/v) FBS (GIBCO). The single cell suspensions were aliquoted, fixed with ice-cold methanol/acetone (50%/50% v/v) or 1% (v/v) PFA and permeabilized with 0.5% (v/v) Tween, whenever necessary. The cells were stained with specific primary antibodies (Table S3). Cells were further incubated with the secondary antibody when necessary. For the co-localization experiments, ZO-1 and claudin-5 primary antibodies were conjugated with a R-Phycoerythrin (Abcam) dye to facilitate the setup of the experiment. Percentages of positive cells were calculated based in the isotype controls (1% of overlap with the isotype scatter plot). FACS Calibur and Accuri C6 were used for the acquisition and FlowJo was used for data analysis.

### **Expression of adhesion molecules in the BCLECs.**

The expression of the adhesion proteins was assessed by flow cytometry. After the maturation of the cells for 4 passages in the presence of all soluble factors, the cells were purified for CD31 marker and plated on Matrigel-coated filters. After 5 days in the filters, the cells were exposed to Tumor Necrosis Factor- $\alpha$  (TNF- $\alpha$ ) (10 ng/mL) for 24 h. The subsequent protocol was performed as previously described for flow cytometry experiments. The single cell suspensions were aliquoted and cells were stained with specific primary antibodies (Table S3). Cells were further incubated with the secondary antibody when necessary (Table S3). Non-treated cells were used to determine the basal expression of adhesion proteins. HUVECs were used as a control.

### **Total RNA extraction and quantitative real-time polymerase chain reaction (qRT-PCR) analyses.**

Total RNA was isolated with a RNeasy Micro Kit (Quiagen) and quantified by a NanoDrop ND-1000 spectrophotometer (NanoDrop Technologies, Inc., USA) at 260 nm. The cDNA was reverse transcribed from total RNA using TaqMan reverse transcription reagents kit (Invitrogen) according to manufacturer instructions. qPCR reactions (10  $\mu$ L) were prepared using NZY Speedy qPCR Green Master Mix (2x, 5  $\mu$ L) (Nzytech), primers at a final concentration of 400 nM (1  $\mu$ L each sequence), water (2  $\mu$ L) and cDNA (1  $\mu$ L). The qPCR was run in CFX Connect Real-Time System (BioRad). qPCR reactions in triplicate were performed for each qPCR experiment. Ct data were obtained using Bio-Rad CFX Manager Software. Relative quantification of the target was calculated relative to the housekeeping gene *ACTB*. The  $2^{-\Delta C_t}$  values (relative to the housekeeping gene) were used for the heatmap and hierarchical clustering analyses. The genes and primers sequences are given in Table S2.

### **qPCR using the high-throughput platform BioMark™ HD System –Fluidigm**

The oligos were designed for human transcripts and were synthesized by Sigma. Each RNA sample was diluted to the same concentration (15 ng/ $\mu$ L) and 1  $\mu$ L was used to perform Retro transcription reactions. Fluidigm Reverse Transcription Master Mix (1  $\mu$ L) was added to diluted RNA sample (1  $\mu$ L) and water (3  $\mu$ L) to a final volume of 5  $\mu$ L. To perform the Pre-amplification (PA) of the cDNA samples a pool of primers was prepared. The primers were dissolved at a concentration of 100  $\mu$ M in water. For each assay, a Primer Pair Mix was prepared containing 50  $\mu$ M Forward Primer and 50  $\mu$ M Reverse Primer. In order to prepare 10  $\times$  Pre-amplification Primer Mix (500 nM each primer), 10  $\mu$ L of each of the 96 Primer Pair Mixes (50  $\mu$ M each primer) was mixed with 40  $\mu$ L buffer consisting of 10 mM Tris-HCl, pH 8.0; 0.1 mM EDTA; 0.25% Tween-20. In order to prepare 10 $\times$  Assay (5  $\mu$ M each primer) each Primer Pair Mix was diluted by mixing 10  $\mu$ L Primer Pair Mix (50  $\mu$ M each primer) with 90  $\mu$ L buffer consisting of 10 mM Tris-HCl, pH 8.0; 0.1 mM EDTA; 0.25% Tween-20. PA reaction for each cDNA sample was prepared by mixing PreAmp Master Mix (1  $\mu$ L, Fluidigm), pooled primers (500 nM, 0.5  $\mu$ L), H<sub>2</sub>O (2.25  $\mu$ L) and cDNA (1.25  $\mu$ L). Thermal cycling was performed according to the manufacturer for 18 PA cycles. The samples were then treated with Exonuclease (New England Biolabs) to remove non-hybridized primers. The Fluidigm® 96.96 Gene expression IFC was used with EvaGreen chemistry. After a prime of the chip, a 10 $\times$  assay mix and sample mix were prepared and pipetted into the inlets. The qRT-PCR on the preamplified samples was then carried out with a single pair of primers specific for the target, so non-specific interactions were likely negligible. The chip was loaded and data was collected using the BioMark HD™. Data were analyzed using Fluidigm® Real Time PCR Analysis v2.1 software and genes were normalized against *ACTB*. Genes with melting curves displaying more of one peak (amplification of non-specific products) were not included in the analysis. The genes and primers sequences are given in Table S2.

### **Heatmap and hierarchical clustering analyses**

The data processed by the Cluster 3.0 program was initially centered and then normalized. First, each individual gene expression ( $2^{-\Delta C_t}$ ) (e.g. gene A) was subtracted to the gene expression median (e.g. gene A) for all experimental conditions. At the end, this creates a range of values for each gene so that the median value for all the experimental conditions is 0. Second, the centered values of each gene were normalized, by multiplying each centered value by a scale factor

(calculated by the program; a separate scale factor is computed for each gene) so that the sum of the squares of each value, for all experimental conditions, is 1.0. Therefore, for each gene the normalized values were between +1 to -1. The expression that is above the median is shown in red, the expression below the median in blue, and the expression similar to the median in white. The assembling of the data in terms of heatmap was performed in Java TreeView v1.1 software. The relative gene expression per condition for Figure 3B is given in Table S1.

#### **Stain for actin cytoskeleton and nuclear DAPI.**

To visualize the actin cytoskeleton and nuclear DAPI in a confluent cell layer and in ECM layer post decellularization, we fixed the plates with 4% PFA and permeabilize with 0.1% Triton X-100. Samples were then incubated with phalloidin-fluorescein (50 µg/mL, Sigma) for 40 min and washed twice. The nuclei were counterstained with DAPI and kept in mounting medium. All the photos were taken with the objective of 20x in the In Cell Analyzer 2200.

#### **Stain for collagen and non-collagenous proteins.**

Total amount of collagen in the decellularized ECM was quantified using Sirius Red/Fast Green Collagen staining kit (Chondrex) according to the manufacturer's instructions. The amount of sulfated glycosaminoglycans (sGAG) was quantified by staining with 1,9-dimethylmethylene blue dye (Blyscan Glycosaminoglycan Kit, Biocolor).

#### **Coculture experiments.**

Bovine pericytes, characterized elsewhere (Cecchelli et al., 2014), were immortalized using a SV40 large T antigen strategy (P7-P10). Immortalized cells were defrosted into a 100-mm gelatin-coated petri dish and cultured in Dulbecco's Modified Eagle's Medium (DMEM; Sigma) supplemented with FBS (20%, v/v), L-glutamine (2 mM), geneticin (200 µg/mL, G418, Sigma) and bFGF (1 ng/mL). Pericyte culture was confluent within 2-3 days. Once cells reached confluency, 45 x 10<sup>3</sup> were seeded into each well of 12-well plates (Costar). Endothelial cells cultured in 100-mm fibronectin-coated dishes for 4 passages with protocol 6 were trypsinized and purified using CD31 MACS beads. Cells were seeded at a cell density of 10 x 10<sup>4</sup> in 0.4 µm filters (Costar) coated with Matrigel and kept in culture with EGM-2 supplemented with bFGF (1 ng/mL) for 6 days.

#### **Multidrug resistance accumulation assay.**

Six days after being plated on polycarbonate filters, endothelial cell monolayers were washed with pre-warmed HEPES-buffered Ringer's (RH) solution (NaCl 150 mM, KCl 5.2 mM, CaCl<sub>2</sub> 2.2 mM, MgCl<sub>2</sub> 0.2 mM, NaHCO<sub>3</sub> 6 mM, Glucose 2.8 mM, HEPES 5 mM) with 0.1 % human serum albumin (Sigma). Cells were incubated with RH solution containing Rhodamine123 at a final concentration of 5 µM with or without Pgp inhibitor (0.5 µM elacridar). After 2 h in shaking conditions, Transwell filter with monolayer cells were placed on ice and the cells were washed five times with ice-cold RH solution. Cells were then lysed with RIPA lysis buffer (Millipore) for 3 min at 37°C and 200 µL were transferred to a 96 well-plate for measurements. The fluorescence of the samples was quantified using the wavelengths 501/538 (excitation/emission). Data were normalized against the control (cells without elacridar).

## **SUPPLEMENTAL REFERENCES**

- Haase, A., Olmer, R., Schwanke, K., Wunderlich, S., Merkert, S., Hess, C., Zweigerdt, R., Gruh, I., Meyer, J., Wagner, S., Maier, L. S., Han, D. W., Glage, S., Miller, K., Fischer, P., Schöler, H. R. and Martin, U. (2009). Generation of Induced Pluripotent Stem Cells from Human Cord Blood. *Cell Stem Cell* 4, 434-441.
- Nissan, X., Blondel, S., Navarro, C., Maury, Y., Denis, C., Girard, M., Martinat, C., De Sandre-Giovannoli, A., Levy, N. and Peschanski, M. (2012). Unique preservation of neural cells in Hutchinson- Gilford progeria syndrome is due to the expression of the neural-specific miR-9 microRNA. *Cell reports* 1, 1-9.
- Elliott, D. A., Braam, S. R., Koutsis, K., Ng, E. S., Jenny, R., Lagerqvist, E. L., Biben, C., Hatzistavrou, T., Hirst, C. E., Yu, Q. C., Skelton, R. J., Ward-van Oostwaard, D., Lim, S. M., Khammy, O., Li, X., Hawes, S. M., Davis, R. P., Goulburn, A. L., Passier, R., Prall, O. W., Haynes, J. M., Pouton, C. W., Kaye, D. M., Mummery, C. L., Elefanty, A. G. and Stanley, E. G. (2011). NKX2-5(eGFP/w) hESCs for isolation of human cardiac progenitors and cardiomyocytes. *Nat Methods* 12, 1037-40.
- Vallier, L., Touboul, T., Brown, S., Cho, C., Bilican, B., Alexander, M., Cedervall, J., Chandran, S., Ahrlund-Richter, L., Weber, A. and Pedersen, R. A. (2009). Signaling pathways controlling pluripotency and early cell fate decisions of human induced pluripotent stem cells. *Stem cells (Dayton, Ohio)* 11, 2655-66.
- Cecchelli, R., Aday, S., Sevin, E., Almeida, C., Culot, M., Dehouck, L., Coisne, C., Engelhardt, B., Dehouck, M. P. and Ferreira, L. (2014). A stable and reproducible human blood-brain barrier model derived from hematopoietic stem cells. *PLoS One* 6, e99733.
- Rosa, S., Praca, C., Pitrez, P. R., Gouveia, P. J., Aranguren, X. L., Ricotti, L. and Ferreira, L. S. (2019). Functional characterization of iPSC-derived arterial- and venous-like endothelial cells. *Sci Rep* 1, 3826.

## SUPPLEMENTAL TABLES

**Table S2 - Details of primers for qRT-PCR and Fluidigm.** Related to Figure 2, Figure 3, Figure 4, Figure S1 and Figure S4.

| GENE          | SENSE                   | ANTISENSE                |
|---------------|-------------------------|--------------------------|
| <i>ABCB1</i>  | TGAATCTGGAGGAAGACATGAC  | CCAGGCACCAAAATGAAACC     |
| <i>ABCC1</i>  | AATAGAAGTGTTGGGCTGAG    | CGAGACACCTTAAAGAACAG     |
| <i>ABCC2</i>  | ATATAAGAAGGCATTGACCC    | ATCTGTAGAACACTTGACCA     |
| <i>ABCC4</i>  | AATCTACAACTCGGAGTCCA    | CAAGCCTCTGAATGTAAATCC    |
| <i>ABCC5</i>  | ATTCTGATGTGAACTAACAG    | TTCCTATGTCGATATCCTTC     |
| <i>ABCC8</i>  | GATCATTGTGGGTGTGATTG    | AGCCAGTAGAATGATGACAG     |
| <i>ABCG2</i>  | CAAGATGATGTTGTGATG      | GATTCGTCATAGTTGTTG       |
| <i>ACTB</i>   | CGTCTTCCCCTCCATCGT      | GATGGGGTACTTCAGGGTGA     |
| <i>APCDD1</i> | GGAGTCACAGTGCCATCACAT   | CCTGACCTTACTTCACAGCCT    |
| <i>AXIN2</i>  | AAAGAGAGGAGGTTTCAGATG   | CTGAGTCTGGGAATTTTCTTC    |
| <i>CADH5</i>  | CGCAATAGACAAGGACATAAC   | TATCGTGATTATCCGTGAGG     |
| <i>CAV1</i>   | GATTGACTTTGAAGATGTGATTG | AGAGAATGGCGAAGTAAATG     |
| <i>CCND3</i>  | AGACCAGCACTCCTACAG      | GGCTTAGATGTGGTGTGG       |
| <i>CD31</i>   | AGATACTCTAGAACGGAAGG    | CAGAGGTCTTGAAATACAGG     |
| <i>CD34</i>   | TGAAGCCTAGCCTGTCACCT    | CGCACAGCTGGAGGTCTTAT     |
| <i>CDK4</i>   | TACCTGAGATGGAGGAGTC     | GCAGAGATTGCTTGTGT        |
| <i>CDK6</i>   | GAAAAGTGCAATGATTCTGGA   | GAAGCGAAGTCCTCAACA       |
| <i>CLDN1</i>  | GAAAGACTACGTGTGACA      | GGTCCTAATGTTAATGATAGTATC |
| <i>CLDN3</i>  | ATCACGTCCGAGAACATC      | TACACCTTGCACTGCATCTG     |
| <i>CLDN5</i>  | TTAACAGACGGAATGAAGTT    | AAGCGAAATCCTCAGTCT       |
| <i>COL4A1</i> | AAAGGGAGATCAAGGGATAG    | TCACCTTTTTCTCCAGGTAG     |
| <i>COL4A2</i> | AAAAGGAGATAGAGGCTCAC    | GTATTCCGAAAAATCCAGCC     |
| <i>DAAM1</i>  | GAAGAAGAAAAGCATTCCTCAG  | CAGTTTGTTCTCGGGCAG       |
| <i>ENOS</i>   | AACGTGGAGATCACCGAG      | GGGCAGAAGGAAGAGTTC       |
| <i>SELE</i>   | AGCTTCCCATGGAACACAAC    | CTGGGCTCCCATTAGTTCAA     |
| <i>FN1</i>    | CCATAGCTGAGAAGTGTTTTG   | CAAGTACAATCTACCATCATCC   |
| <i>FZD4</i>   | TACCTCACAAAACCCCATCC    | GGCTGTATAAGCCAGCATCAT    |
| <i>FZD6</i>   | TCGTCAGTACCATATCCCATG   | CCCATTCTGTGCATGTCTTTT    |
| <i>FZD7</i>   | GATGATAACGGCGATGTGA     | AACAAAGCAGCCACCGCAGAC    |
| <i>HES1</i>   | GCCTATTATGGAGAAAAGACG   | CTATCTTTCTTCAGAGCATC     |
| <i>HEY1</i>   | CCGGATCAATAACAGTTTGTC   | CTTTTTCTAGCTTAGCAGATCC   |
| <i>INSR</i>   | TGTTTCATCCTCTGATTCTCTG  | GCTTAGATGTTCCCAAAGTC     |
| <i>H01</i>    | GAAAAGCACATCCAGGCAAT    | GCTGCCACATTAGGGTGTCT     |
| <i>HSPG2</i>  | CCACTACTTCTATTGGTCCC    | GTATTGGATTGGTGGAGATTAC   |
| <i>ITGA1</i>  | CAGGTTGGAATTGTACAGTATG  | TGTCTATTCCAAGAGCTGTC     |

|                                      |                          |                          |
|--------------------------------------|--------------------------|--------------------------|
| <b><i>ITGA3</i></b>                  | AGGTAATCCATGGAGAGAAG     | GTAGAAGTTCTCATCCACATC    |
| <b><i>ITGA4</i></b>                  | AAAGCTTGGATCGTACTTTG     | CTCTTCCTTCCTCTCTGATG     |
| <b><i>ITGA5</i></b>                  | AAGCTTGGATTCTTCAAACG     | TCCTTTTCAGTAGAATGAGGG    |
| <b><i>ITGA6</i></b>                  | AAATACCAAACCAACACAGG     | TACTGAATCTGAGAGGGAAC     |
| <b><i>ITGB3</i></b>                  | AATCTGCTGAAGGATAACTGT    | CTCTGGGGACTGACTTGA       |
| <b><i>ITGB4</i></b>                  | ATCTGGACAACCTCAAGAAG     | GCCAAATCCAATAGTGTAGTC    |
| <b><i>JAG1</i></b>                   | GTCTCAAAGAAGCGATCAG      | ATATACTCCGCCGATTGG       |
| <b><i>LAMA4</i></b>                  | GAAATTGCATTTGAAGTCCG     | ACCTGTCCATTTTTTCATGTG    |
| <b><i>LAMA5</i></b>                  | ATCCTATGACTTCATCAGCC     | TTGTTATAGAAGAGGGAGAGG    |
| <b><i>LAMB1</i></b>                  | GTGTGTATAGATACTTCGCC     | AAAGCACGAAATATCACCTC     |
| <b><i>LAMC1</i></b>                  | TCTCCTCTACCTTTTCAGATTG   | GGTTCTGACCATAACTCAAC     |
| <b><i>LDLR</i></b>                   | GCCATTGTCGTCTTTATGTC     | AAACACATACCCATCAACGA     |
| <b><i>LEF1</i></b>                   | AAGGAACACTGACATCAATT     | TTTGGAACTTGGCTCTTG       |
| <b><i>LEPR</i></b>                   | GGAAATCACACGAAATTCAC     | GCACGATATTTACTTTGCTC     |
| <b><i>LRP1</i></b>                   | GACTACATTGAATTTGCCAGCC   | TCTTGTGGGCTCGGTTAATG     |
| <b><i>MFSD2A</i></b>                 | CAAAC TTATTACTGGCTTCCTC  | AGATGGGAATGGTTAAAGTG     |
| <b><i>NOTCH1</i></b>                 | ATCTGAAATAGGAAACAAGTGAA  | ATAACCAACGAACA ACTACATAA |
| <b><i>NOTCH2</i></b>                 | AACATCTCATCCATGCTTTG     | ACAGTGGTACAGGTACTTC      |
| <b><i>NOTCH4</i></b>                 | ATTGACACCCAGCTTCTTG      | GAGGACAAGGGTCTTCAA       |
| <b><i>OCN</i></b>                    | TTCTGGATCTCTATATGGTTCA   | CCACAACACAGTAGTGATAC     |
| <b><i>P21</i></b>                    | CTCTACATCTTCTGCCTTAGT    | TCTCATTCAACCGCCTAG       |
| <b><i>PLVAP</i></b>                  | CAATGCAGAGATCAATTCAAGG   | ACGCTTTCCTTATCCTTAGTG    |
| <b><i>RAR<math>\alpha</math></i></b> | CCATCCTCAGAACTCACAA      | ACCAGCGAGAATTAATACCT     |
| <b><i>RAR<math>\beta</math></i></b>  | CACCTAGAGGATAAGCACTT     | GGACTCACTGACAGAACA       |
| <b><i>RAR<math>\gamma</math></i></b> | CCACCTTCTTGCTCCTAC       | CTTTCACCTCTGTTCTCT       |
| <b><i>SLC2A1</i></b>                 | ACGCTCTGATCCCTCTCAGT     | GCAGTACACACCGATGATGAAG   |
| <b><i>SLC3A2</i></b>                 | TTGGCTCCAAGGAAGATT       | GAGTAAGGTCCAGAATGACA     |
| <b><i>SLC6A8</i></b>                 | TGAGAGAATGAGATTTCTGCTTGT | TAGGGCTCACAGGGATGG       |
| <b><i>SLC6A12</i></b>                | AAGGTGGTTTATTTTCACAGC    | TTCAAGTAGTAGATGATGCCC    |
| <b><i>SLC7A1</i></b>                 | CCTCCTGAGACATCTTTG       | CTGGAATATGACGGGAAG       |
| <b><i>SLC7A5</i></b>                 | TTGACACCACTAAGATGAT      | GTAGCAATGAGGTTCCAA       |
| <b><i>SLC16A1</i></b>                | ACACAAAGCCAATAAGAC       | ACAGAATCCAACATAGGTA      |
| <b><i>SLC44A5</i></b>                | TTTCTCCAGAGATGTTTCCC     | TACAACACTTCTTGTCCCTC     |
| <b><i>STRA6</i></b>                  | TTTGGAATCGTGCTCTCCG      | AAGGTGAGTAAGCAGGACAAG    |
| <b><i>TLE1</i></b>                   | TATTCCAGTCCAAAGAGTCC     | AGATGACTTCATAGACTGTAGC   |
| <b><i>TFRC</i></b>                   | ATGCTGACAATAACACAA       | CCAAGTAGCCAATCATAA       |
| <b><i>VEGFR2</i></b>                 | GTACATAGTTGTCTGTTGTAGG   | TCAATCCCCACATTTAGTTC     |
| <b><i>VWF</i></b>                    | TGTATCTAGAACTGAGGCTG     | CCTTCTTGGGTCATAAAGTC     |
| <b><i>WIF1</i></b>                   | AGTTGTTCAAGTTGGTTTCC     | TAGCATTTTGAGGTGTTTGG     |
| <b><i>ZO1</i></b>                    | CCTGAACCAGTATCTGATAA     | AATCTTCTCACTCCTTCTG      |

**Table S3 - Details of antibodies used for immunofluorescence and flow cytometry.** Related to all main Figures and Supplemental figures.

| <b>Antibody</b>                   | <b>Dilution</b> | <b>Technique</b>   | <b>Supplier</b>          | <b>Catalog Number</b> |
|-----------------------------------|-----------------|--------------------|--------------------------|-----------------------|
| <b>CD31</b>                       | 1:50            | ICC                | DAKO/Labometer           | M0823                 |
| <b>VE-CADHERIN</b>                | 1:100           | ICC                | Life Technology          | sc-9989               |
| <b>TIE-2</b>                      | 1:100           | ICC                | R&D Systems              | AF313                 |
| <b>vWF</b>                        | 1:100           | ICC                | Dako                     | A0082                 |
| <b>ZO-1</b>                       | 1:200           | ICC                | Life Technology          | 61-7300               |
| <b>CLAUDIN-5</b>                  | 1:100           | ICC/Flow cytometry | Life Technology          | 34-1600               |
| <b>OCCLUDIN</b>                   | 1:200           | ICC/Flow cytometry | Life Technology          | 71-1500               |
| <b>GLUT-1</b>                     | 1:50            | ICC/Flow cytometry | Millipore                | 07-1401               |
| <b>PGP</b>                        | 1:10            | ICC                | GeneTex                  | GTX23364              |
| <b>ICAM-1</b>                     | 1:100           | Flow cytometry     | Santa Cruz Biotechnology | sc-107                |
| <b>*PE-conjugated anti-VEGFR2</b> | 10:200          | Flow cytometry     | R&D Systems              | FAB357P               |
| <b>*FITC-conjugated anti-CD31</b> | 5:200           | Flow cytometry     | EBioscience              | 11-0319-42            |
| <b>*PE-conjugated anti-PGP</b>    | 5:200           | Flow cytometry     | Abcam                    | Ab93590               |
| <b>*FITC-conjugated anti-PGP</b>  | 20:200          | Flow cytometry     | BD Pharmigen             | 557002                |
| <b>*PE-conjugated anti ICAM-2</b> | 5:100           | Flow cytometry     | BioLegend                | 328506                |
| <b>R-PE conjugation KIT</b>       |                 | Flow cytometry     | Abcam                    | Ab102918              |
| <b>Phalloidin-fluorescein</b>     | 50 µg/mL        | ICC                | Sigma                    | P5282                 |
| <b>Anti rabbit Cy3</b>            | 1:100           | ICC/Flow cytometry | JacksonImmuniResearch    | 111-165-144           |
| <b>Anti mouse Cy3</b>             | 1:100           | ICC/Flow cytometry | Sigma                    | C2181                 |
| <b>Anti rabbit Alexa 488</b>      | 1:200           | ICC                | Life Technology          | A11034                |
| <b>Anti mouse Alexa 488</b>       | 1:200           | ICC                | Life Technology          | A11001                |
| <b>Anti mouse Alexa 555</b>       | 1:200           | ICC                | Life Technology          | A21422                |

**Table S4 - Details of products used.** Related to experimental procedures.

| <b>Product</b>                                     | <b>Supplier</b>         | <b>Catalog number</b> |
|----------------------------------------------------|-------------------------|-----------------------|
| <b>EGM-2 bullet kit</b>                            | Lonza                   | CABRCC-3162           |
| <b>FGF-b</b>                                       | Peprotech               | 167100-18B-B          |
| <b>BMP 4</b>                                       | Peprotech               | 120-05ET              |
| <b>VEGF</b>                                        | Peprotech               | 100-20                |
| <b>Tβ4</b>                                         | Caslo peptide synthesis | S-1298                |
| <b>Wnt3a</b>                                       | R&D Systems             | 5036-WN               |
| <b>SB 431542</b>                                   | Tocris                  | 1614                  |
| <b>RA</b>                                          | Sigma                   | R2625                 |
| <b>Transferrin</b>                                 | Sigma                   | T8158                 |
| <b>Insulin</b>                                     | Sigma                   | I9278                 |
| <b>TNF-α</b>                                       | Peprotech               | 300-01A               |
| <b>CD31 MACS beads</b>                             | Miltenyi Biotec         | 130-102-608           |
| <b>Lucifer yellow</b>                              | Sigma                   | L-0259                |
| <b>Sirius red/fast green collagen staining kit</b> | Chondrex                | 9046                  |
| <b>Blyscan glycosaminoglycan kit</b>               | Biocolor                | 054B1000              |
| <b>Matrigel</b>                                    | BD                      | 354234                |
| <b>Fibronectin</b>                                 | Calbiochem              | 341631                |
